# Supplementary material for: Impact of the Family and Household Environment on Pediatric Atopic Dermatitis in Japan
Source: MDPI journal article supplement (doi:10.3390/jcm12082988), 2023-04-20

# **Impact of the family and household environment on pediatric atopic dermatitis in Japan**

## **Supplementary Material**

**Hidehisa Saeki <sup>1\*</sup>, Yukihiro Ohya <sup>2</sup>, Hisakatsu Nawata <sup>3</sup>, Kazuhiko Arima <sup>3</sup>, Miho Inukai <sup>4</sup>, Ana B. Rossi <sup>5</sup> and Gaelle Bego-Le-Bagousse <sup>6</sup>**

<sup>1</sup> Department of Dermatology, Nippon Medical School, 1-1-5 Sendagi, Bunkyo-ku, Tokyo, 113-8603, Japan

<sup>2</sup> Allergy Center, National Center for Child Health and Development, Setagaya-ku, 157-8535 Tokyo, Japan

<sup>3</sup> Specialty Care Medical, Sanofi K.K., Shinjuku-ku, 163-1488 Tokyo, Japan

<sup>4</sup> Market Access, Sanofi K.K., Shinjuku-ku, 163-1488 Tokyo, Japan

<sup>5</sup> Sanofi, Cambridge, 02139 MA, USA

<sup>6</sup> Sanofi, Chilly-Mazarin, 91380 Paris, France

\* Correspondence: h-saeki@nms.ac.jp; Tel.: +81-3-3822-2131

## Supplemental Figures

**Supplemental Figure S1** Current residency of families of Japanese pediatric patients with atopic dermatitis by disease severity and age group.

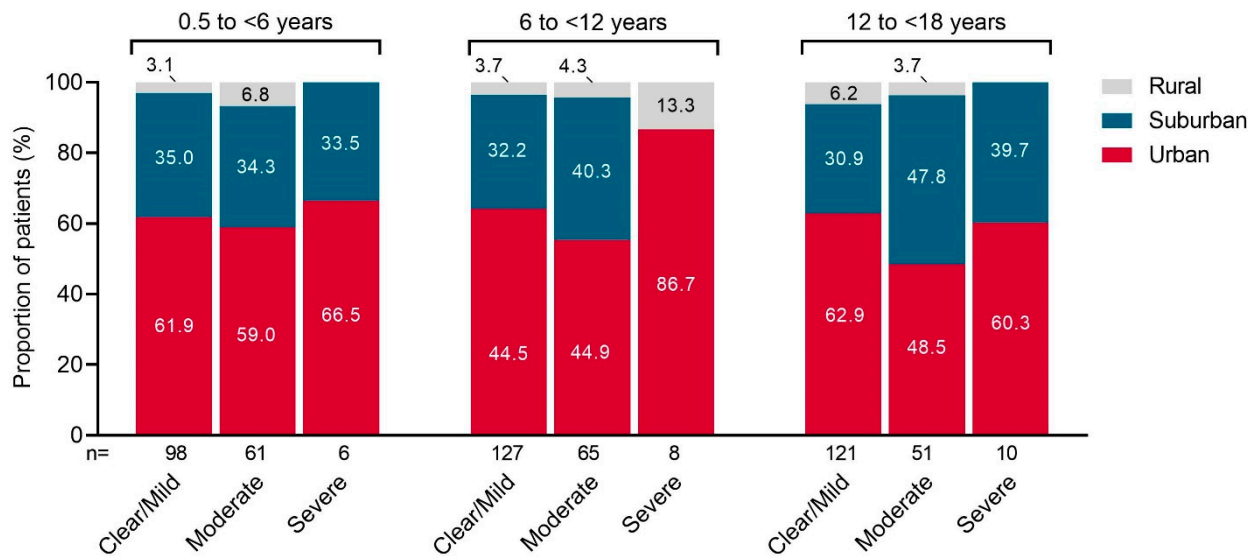

**Supplemental Figure S2** Proportion of households with or without smokers by severity of atopic dermatitis in Japanese pediatric patients across age groups.

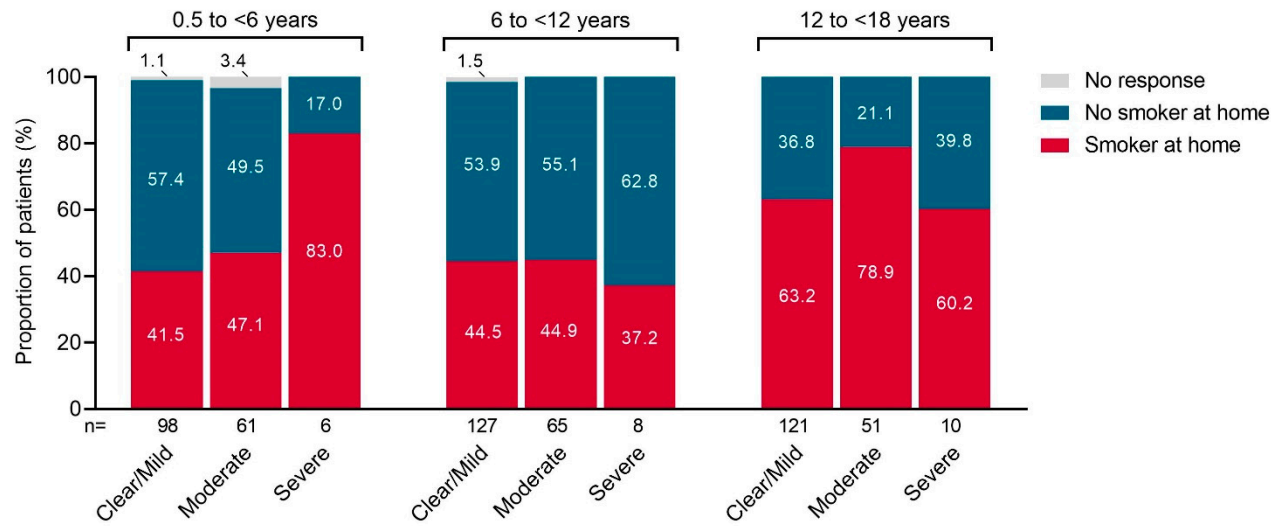

**Supplemental Figure S3** Number of household pets by severity of atopic dermatitis in Japanese pediatric patients across age groups.

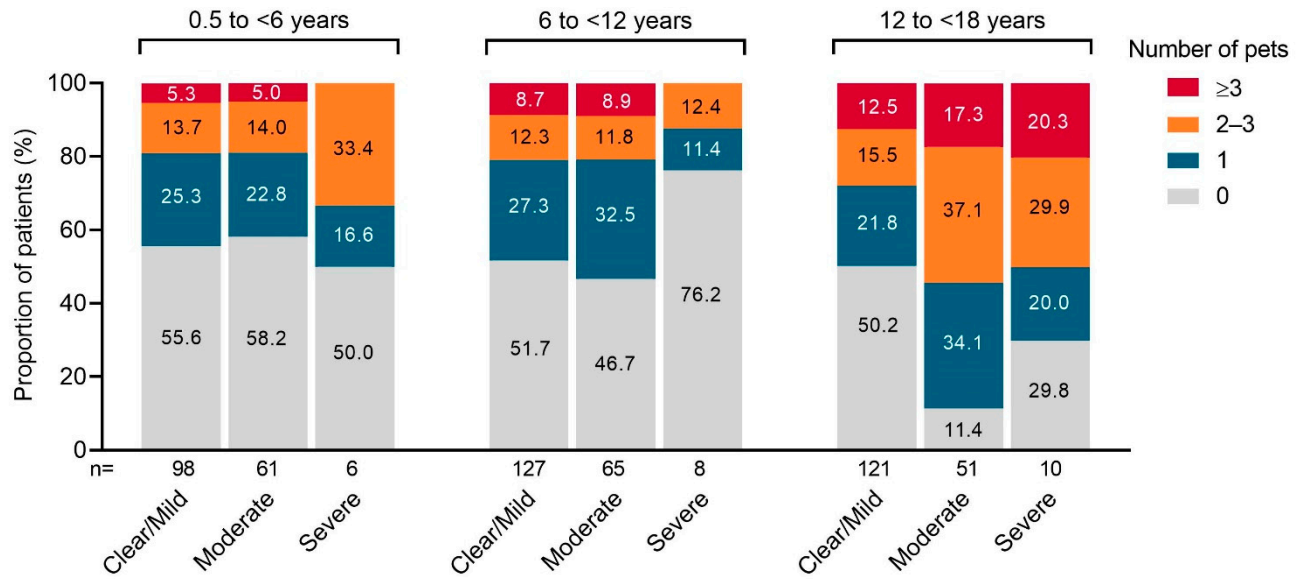

**Supplemental Figure S4** Parents' highest education level by severity of atopic dermatitis in Japanese pediatric patients across age groups.

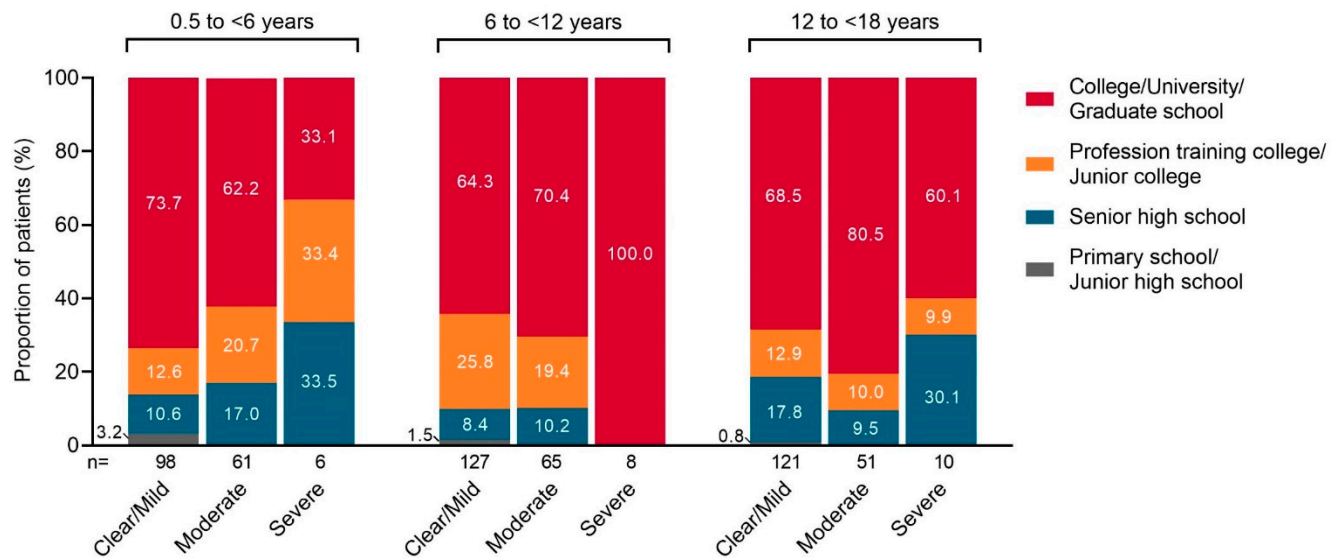

Japanese pediatric patients across age groups.

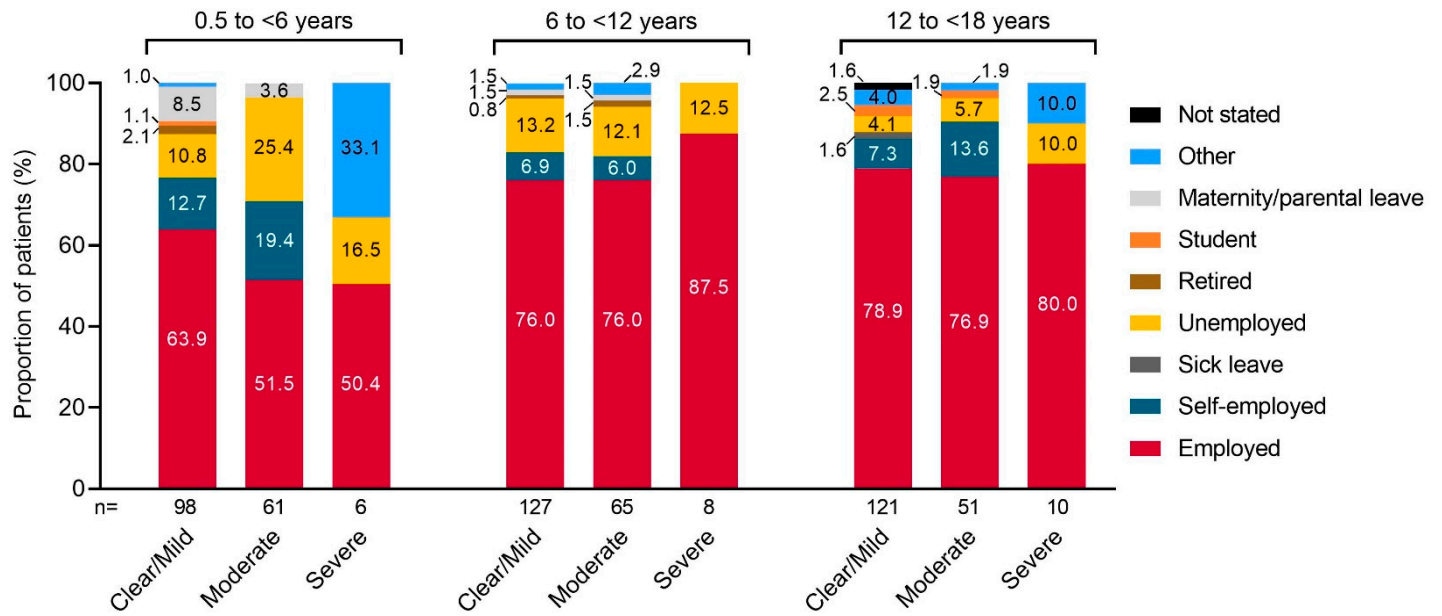

Supplement: s1 [file s1]
